# Supplementary material for: Uthrene, a radically new molecule?
Source: Royal Society of Chemistry journal article supplement (doi:10.1039/c5cc01276g), 2015-01-01
Supplement: c5cc01276g1.pdf [file c5cc01276g1.pdf]

## Supplemental information

### 1.0 Total energies for all DFT calculations

|             | Closed shell restricted | Singlet unrestricted | Triplet unrestricted | Triplet restricted-open | Model            |
|-------------|-------------------------|----------------------|----------------------|-------------------------|------------------|
| Fulminene   | -1000.495302            | -1000.495302         | -1000.401658         | -1000.398281            | B3LYP/6-31g(d,p) |
| Hexacene    | -1000.458642            | -1000.45881          | -1000.441285         | -1000.43723             | B3LYP/6-31g(d,p) |
| Zethrene    | -923.0576062            | -923.0576058         | -923.029753          | -923.024469             | B3LYP/6-31g(d,p) |
| Uthrene     | -922.9988346            | -923.0224395         | -923.0302767         | -923.0226217            | B3LYP/6-31g(d,p) |
| Triangulene | N.C.                    | -845.6194833         | -845.6306501         | -845.6226249            | B3LYP/6-31g(d,p) |

|             |              |              |              |              |                      |
|-------------|--------------|--------------|--------------|--------------|----------------------|
| Fulminene   | -999.9084356 | -999.9084359 | -999.8083351 | -999.8002681 | CAM-B3LYP/6-31g(d,p) |
| Hexacene    | -999.8624695 | -999.8667273 | -999.8453742 | -999.8374288 | CAM-B3LYP/6-31g(d,p) |
| Zethrene    | -922.5136961 | -922.5136961 | -922.4873616 | -922.4763602 | CAM-B3LYP/6-31g(d,p) |
| Uthrene     | -922.441056  | -922.4791934 | -922.4914136 | -922.4757001 | CAM-B3LYP/6-31g(d,p) |
| Triangulene | -845.0850809 | -845.1220831 | -845.1399606 | -845.1232147 | CAM-B3LYP/6-31g(d,p) |

|             |              |              |              |              |                  |
|-------------|--------------|--------------|--------------|--------------|------------------|
| Fulminene   | -999.4096562 | -999.4096562 | -999.3157966 | -999.3114248 | HSE06/6-31g(d,p) |
| Hexacene    | -999.3701944 | -999.3719311 | -999.3554736 | -999.3504171 | HSE06/6-31g(d,p) |
| Zethrene    | -922.0591741 | -922.059174  | -922.0332122 | -922.0263179 | HSE06/6-31g(d,p) |
| Uthrene     | N.C.         | -922.0260061 | -922.0351929 | -922.0251611 | HSE06/6-31g(d,p) |
| Triangulene | N.C.         | -844.7101277 | -844.7229774 | -844.7124661 | HSE06/6-31g(d,p) |

|                    |              |  |  |  |                  |
|--------------------|--------------|--|--|--|------------------|
| Graphene*          | -76.16057549 |  |  |  | HSE06/6-31g(d,p) |
| Molecular Hydrogen | -1.167279086 |  |  |  | HSE06/6-31g(d,p) |

Table S1. Total energies in Hartree for all geometry optimized calculations at all levels.

\*: Graphene has two carbon atoms per unit cell.

N.C.: Calculation Not Converged.

## 2.0 Molecular pictures of open-shell ground state geometries optimized at the CAM-B3LYP/6-31g(d,p) level

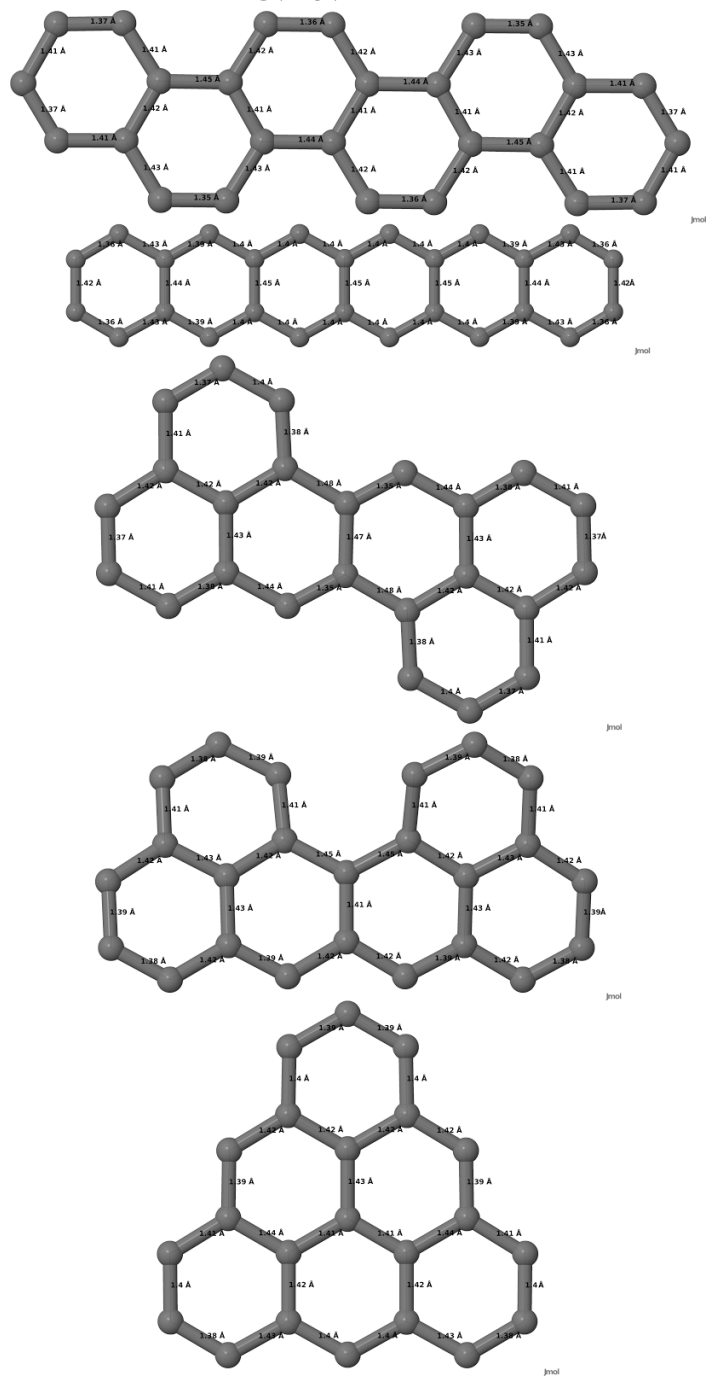

Figure S1. Geometries optimized at the CAM-B3LYP/6-31g(d,p) level singlet unrestricted

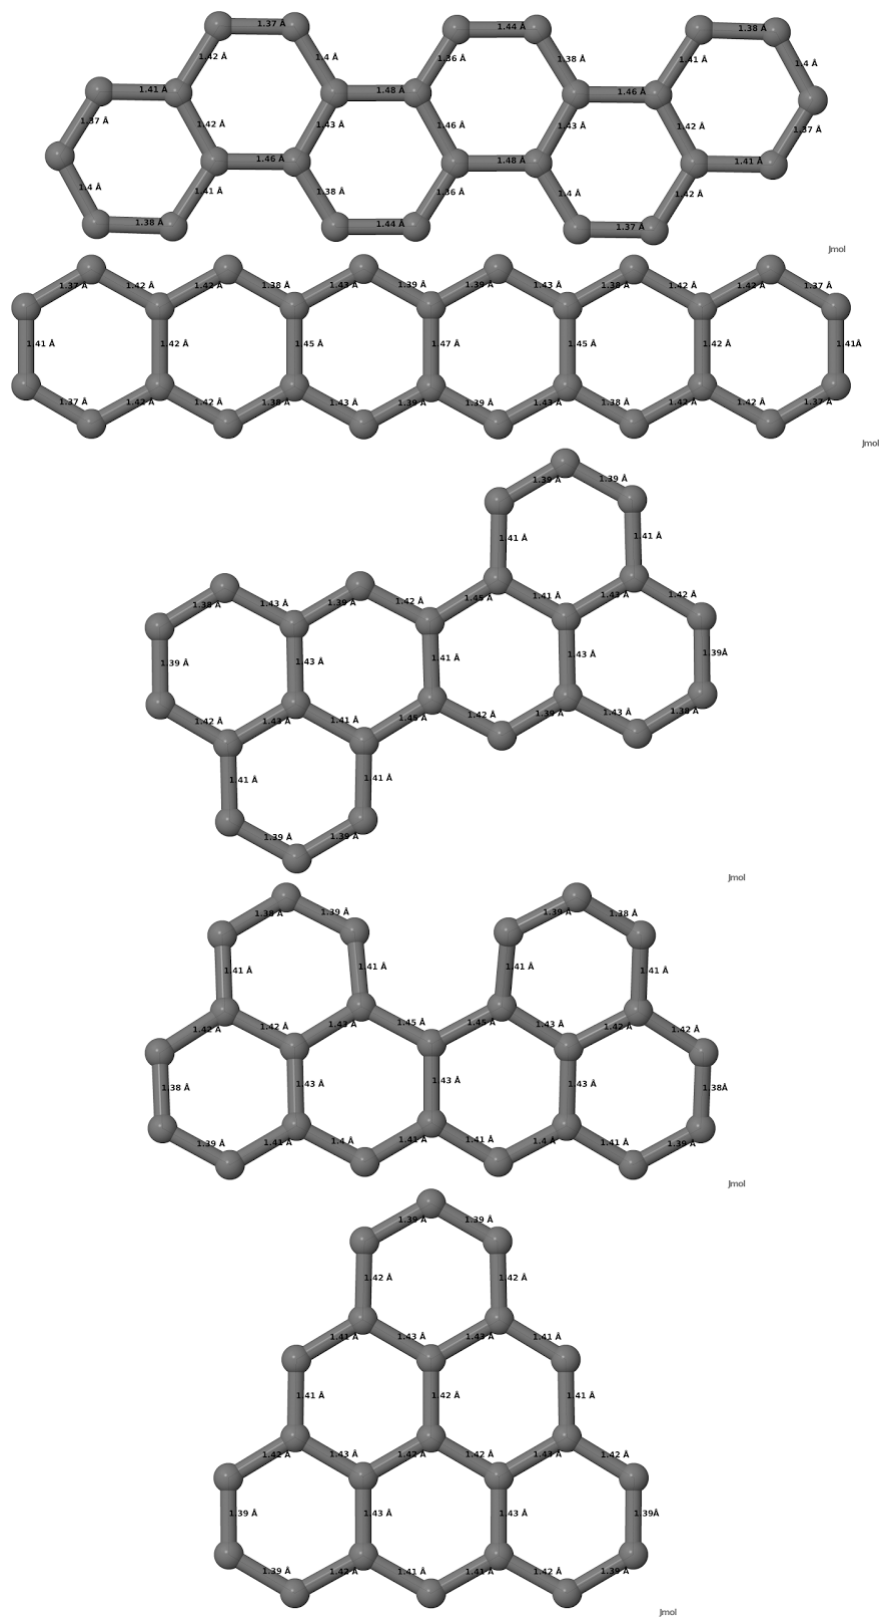

Figure S2. Geometries optimized at the CAM-B3LYP/6-31g(d,p) level triplet unrestricted

### 3.0 Geometries optimized at the CAM-B3LYP/6-31g(d,p) level, XYZ cartesian coordinates.

closed\_shell\_restricted\_fulminene.xyz:

|   |          |          |         |
|---|----------|----------|---------|
| C | 2.18901  | -3.71591 | 0.00000 |
| C | 2.05902  | -2.36793 | 0.00000 |
| C | 1.77287  | 0.56166  | 0.00000 |
| C | 1.64552  | 1.91477  | 0.00000 |
| C | 1.35562  | 4.86863  | 0.00000 |
| C | 1.19253  | 6.23318  | 0.00000 |
| C | -0.09425 | 6.79788  | 0.00000 |
| C | -1.19253 | 5.97581  | 0.00000 |
| C | -2.18901 | 3.71591  | 0.00000 |
| C | -2.05902 | 2.36793  | 0.00000 |
| C | -1.77287 | -0.56166 | 0.00000 |
| C | -1.64552 | -1.91477 | 0.00000 |
| C | -1.35562 | -4.86863 | 0.00000 |
| C | -1.19253 | -6.23318 | 0.00000 |
| C | 0.09425  | -6.79788 | 0.00000 |
| C | 1.19253  | -5.97581 | 0.00000 |
| C | -1.04763 | 4.57205  | 0.00000 |
| C | 0.24458  | 3.99493  | 0.00000 |
| C | -0.77335 | 1.73673  | 0.00000 |
| C | 0.37380  | 2.54991  | 0.00000 |
| C | -0.63908 | 0.29810  | 0.00000 |
| C | 0.63908  | -0.29810 | 0.00000 |
| C | -0.37380 | -2.54991 | 0.00000 |
| C | 0.77335  | -1.73673 | 0.00000 |
| C | -0.24458 | -3.99493 | 0.00000 |
| C | 1.04763  | -4.57205 | 0.00000 |
| H | 3.17575  | -4.16923 | 0.00000 |
| H | 2.95581  | -1.76297 | 0.00000 |
| H | 2.77042  | 0.14315  | 0.00000 |
| H | 2.54624  | 2.51496  | 0.00000 |
| H | 2.36172  | 4.46852  | 0.00000 |
| H | 2.06495  | 6.87846  | 0.00000 |
| H | -0.21509 | 7.87608  | 0.00000 |
| H | -2.19486 | 6.39403  | 0.00000 |
| H | -3.17575 | 4.16923  | 0.00000 |
| H | -2.95581 | 1.76297  | 0.00000 |
| H | -2.77042 | -0.14315 | 0.00000 |

|   |          |          |         |
|---|----------|----------|---------|
| H | -2.54624 | -2.51496 | 0.00000 |
| H | -2.36172 | -4.46852 | 0.00000 |
| H | -2.06495 | -6.87846 | 0.00000 |
| H | 0.21509  | -7.87608 | 0.00000 |
| H | 2.19486  | -6.39403 | 0.00000 |

-----

closed\_shell\_restricted\_hexacene.xyz:

|   |         |          |          |
|---|---------|----------|----------|
| C | 0.00000 | 7.31589  | 0.71805  |
| C | 0.00000 | 6.15068  | 1.40725  |
| C | 0.00000 | 4.88390  | 0.72499  |
| C | 0.00000 | 4.88390  | -0.72499 |
| C | 0.00000 | 6.15068  | -1.40725 |
| C | 0.00000 | 7.31589  | -0.71805 |
| C | 0.00000 | 3.68642  | 1.40290  |
| C | 0.00000 | 3.68642  | -1.40290 |
| C | 0.00000 | 2.44210  | -0.72471 |
| C | 0.00000 | 2.44210  | 0.72471  |
| C | 0.00000 | 1.22836  | 1.40288  |
| H | 0.00000 | 1.22860  | 2.48947  |
| C | 0.00000 | 0.00000  | 0.72481  |
| C | 0.00000 | 0.00000  | -0.72481 |
| C | 0.00000 | 1.22836  | -1.40288 |
| H | 0.00000 | 3.68667  | 2.48960  |
| H | 0.00000 | 8.26352  | 1.24645  |
| H | 0.00000 | 6.14740  | 2.49317  |
| H | 0.00000 | 6.14740  | -2.49317 |
| H | 0.00000 | 8.26352  | -1.24645 |
| H | 0.00000 | 3.68667  | -2.48960 |
| H | 0.00000 | 1.22860  | -2.48947 |
| C | 0.00000 | -1.22836 | -1.40288 |
| C | 0.00000 | -1.22836 | 1.40288  |
| C | 0.00000 | -2.44210 | 0.72471  |
| C | 0.00000 | -2.44210 | -0.72471 |
| H | 0.00000 | -1.22860 | 2.48947  |
| H | 0.00000 | -1.22860 | -2.48947 |
| C | 0.00000 | -3.68642 | -1.40290 |
| C | 0.00000 | -3.68642 | 1.40290  |
| C | 0.00000 | -4.88390 | 0.72499  |
| C | 0.00000 | -4.88390 | -0.72499 |
| H | 0.00000 | -3.68667 | -2.48960 |
| H | 0.00000 | -3.68667 | 2.48960  |

|   |         |          |          |
|---|---------|----------|----------|
| C | 0.00000 | -6.15068 | -1.40725 |
| C | 0.00000 | -6.15068 | 1.40725  |
| C | 0.00000 | -7.31589 | -0.71805 |
| H | 0.00000 | -8.26352 | -1.24645 |
| C | 0.00000 | -7.31589 | 0.71805  |
| H | 0.00000 | -8.26352 | 1.24645  |
| H | 0.00000 | -6.14740 | -2.49317 |
| H | 0.00000 | -6.14740 | 2.49317  |

-----

closed\_shell\_restricted\_triangulene.xyz:

|   |         |          |          |
|---|---------|----------|----------|
| C | 0.00000 | -1.20061 | 3.52216  |
| C | 0.00000 | -1.22691 | 2.11565  |
| C | 0.00000 | 0.00000  | 1.40771  |
| C | 0.00000 | 1.22691  | 2.11565  |
| C | 0.00000 | 1.20061  | 3.52216  |
| C | 0.00000 | 0.00000  | 4.22002  |
| H | 0.00000 | -2.14169 | 4.06506  |
| H | 0.00000 | 2.14169  | 4.06506  |
| H | 0.00000 | 0.00000  | 5.30396  |
| C | 0.00000 | 0.00000  | -0.00705 |
| C | 0.00000 | -1.23006 | -0.71420 |
| C | 0.00000 | -2.48090 | 0.00623  |
| C | 0.00000 | -1.22383 | -2.14639 |
| C | 0.00000 | -3.70032 | -0.70441 |
| C | 0.00000 | -2.48494 | -2.79778 |
| C | 0.00000 | -3.67590 | -2.08974 |
| H | 0.00000 | -2.50257 | -3.88296 |
| H | 0.00000 | -4.61336 | -2.63813 |
| C | 0.00000 | 1.23006  | -0.71420 |
| C | 0.00000 | 1.22383  | -2.14639 |
| C | 0.00000 | 2.48090  | 0.00623  |
| C | 0.00000 | 2.48494  | -2.79778 |
| C | 0.00000 | 3.70032  | -0.70441 |
| C | 0.00000 | 3.67590  | -2.08974 |
| H | 0.00000 | 2.50257  | -3.88296 |
| H | 0.00000 | 4.63655  | -0.15740 |
| H | 0.00000 | 4.61336  | -2.63813 |
| C | 0.00000 | 2.44081  | 1.40478  |
| C | 0.00000 | -2.44081 | 1.40478  |
| C | 0.00000 | 0.00000  | -2.82686 |
| H | 0.00000 | 3.37607  | 1.95828  |

|   |         |          |          |
|---|---------|----------|----------|
| H | 0.00000 | -3.37607 | 1.95828  |
| H | 0.00000 | 0.00000  | -3.91206 |
| H | 0.00000 | -4.63655 | -0.15740 |

-----

closed\_shell\_restricted\_uthrene.xyz:

|   |          |          |          |
|---|----------|----------|----------|
| C | -0.17476 | -1.23335 | 2.15623  |
| C | 0.17476  | 1.23335  | 2.15623  |
| C | 0.47700  | 3.68987  | 2.10195  |
| C | 0.44911  | 4.88657  | 1.39719  |
| C | 0.16454  | 4.91578  | 0.04284  |
| C | -0.45706 | 3.68431  | -2.00231 |
| C | -0.78551 | 2.50587  | -2.63693 |
| C | -0.67961 | 1.29183  | -1.95792 |
| C | 0.67961  | -1.29183 | -1.95792 |
| C | 0.78551  | -2.50587 | -2.63693 |
| C | 0.45706  | -3.68431 | -2.00231 |
| C | -0.16454 | -4.91578 | 0.04284  |
| C | -0.44911 | -4.88657 | 1.39719  |
| C | -0.47700 | -3.68987 | 2.10195  |
| C | -0.08567 | 3.70605  | -0.63925 |
| C | 0.00000  | 2.46966  | 0.05778  |
| C | -0.20644 | 1.24678  | -0.63496 |
| C | 0.00000  | 0.00000  | 0.06391  |
| C | 0.24407  | 2.45011  | 1.46803  |
| C | 0.00000  | 0.00000  | 1.49719  |
| C | 0.20644  | -1.24678 | -0.63496 |
| C | 0.00000  | -2.46966 | 0.05778  |
| C | 0.08567  | -3.70605 | -0.63925 |
| C | -0.24407 | -2.45011 | 1.46803  |
| H | -0.27632 | -1.23123 | 3.23661  |
| H | 0.27632  | 1.23123  | 3.23661  |
| H | 0.66611  | 3.69780  | 3.17084  |
| H | 0.63720  | 5.81606  | 1.92564  |
| H | 0.11933  | 5.85377  | -0.49992 |
| H | -0.53179 | 4.62796  | -2.53523 |
| H | -1.14737 | 2.51917  | -3.65923 |
| H | -1.02165 | 0.38497  | -2.43791 |
| H | 1.02165  | -0.38497 | -2.43791 |
| H | 1.14737  | -2.51917 | -3.65923 |
| H | 0.53179  | -4.62796 | -2.53523 |
| H | -0.11933 | -5.85377 | -0.49992 |

|   |          |          |         |
|---|----------|----------|---------|
| H | -0.63720 | -5.81606 | 1.92564 |
| H | -0.66611 | -3.69780 | 3.17084 |

-----

closed\_shell\_restricted\_zethrene.xyz:

|   |          |          |         |
|---|----------|----------|---------|
| C | -1.64983 | 0.78982  | 0.00000 |
| C | -1.06713 | -1.62278 | 0.00000 |
| C | -0.34393 | -3.98471 | 0.00000 |
| C | 0.71136  | -4.93349 | 0.00000 |
| C | 2.01869  | -4.52545 | 0.00000 |
| C | 2.37802  | 2.06840  | 0.00000 |
| C | 2.69186  | 3.43617  | 0.00000 |
| C | 1.69945  | 4.38161  | 0.00000 |
| C | -0.71136 | 4.93349  | 0.00000 |
| C | -2.01869 | 4.52545  | 0.00000 |
| C | -2.33264 | 3.15491  | 0.00000 |
| C | 2.33264  | -3.15491 | 0.00000 |
| C | 1.33662  | -2.19737 | 0.00000 |
| C | 1.64983  | -0.78982 | 0.00000 |
| C | 0.71136  | 0.18532  | 0.00000 |
| C | -0.03047 | -2.59946 | 0.00000 |
| C | -0.71136 | -0.18532 | 0.00000 |
| C | 1.06713  | 1.62278  | 0.00000 |
| C | 0.03047  | 2.59946  | 0.00000 |
| C | 0.34393  | 3.98471  | 0.00000 |
| C | -1.33662 | 2.19737  | 0.00000 |
| H | -2.70426 | 0.53868  | 0.00000 |
| H | 0.46155  | -5.98998 | 0.00000 |
| H | 2.81894  | -5.25817 | 0.00000 |
| H | 3.19738  | 1.36019  | 0.00000 |
| H | 3.73373  | 3.73939  | 0.00000 |
| H | 1.94009  | 5.44022  | 0.00000 |
| H | -0.46155 | 5.98998  | 0.00000 |
| H | -2.81894 | 5.25817  | 0.00000 |
| H | -3.37158 | 2.83917  | 0.00000 |
| C | -2.37802 | -2.06840 | 0.00000 |
| C | -1.69945 | -4.38161 | 0.00000 |
| C | -2.69186 | -3.43617 | 0.00000 |
| H | -3.73373 | -3.73939 | 0.00000 |
| H | -3.19738 | -1.36019 | 0.00000 |
| H | -1.94009 | -5.44022 | 0.00000 |
| H | 2.70426  | -0.53868 | 0.00000 |



|   |         |          |         |
|---|---------|----------|---------|
| H | 3.37158 | -2.83917 | 0.00000 |
|---|---------|----------|---------|

-----

singlet\_open\_shell\_unrestricted\_fulminene.xyz:

|   |          |          |         |
|---|----------|----------|---------|
| C | 2.18923  | -3.71571 | 0.00000 |
| C | 2.05928  | -2.36783 | 0.00000 |
| C | 1.77286  | 0.56193  | 0.00000 |
| C | 1.64540  | 1.91491  | 0.00000 |
| C | 1.35550  | 4.86820  | 0.00000 |
| C | 1.19254  | 6.23276  | 0.00000 |
| C | -0.09416 | 6.79754  | 0.00000 |
| C | -1.19254 | 5.97558  | 0.00000 |
| C | -2.18923 | 3.71571  | 0.00000 |
| C | -2.05928 | 2.36783  | 0.00000 |
| C | -1.77286 | -0.56193 | 0.00000 |
| C | -1.64540 | -1.91491 | 0.00000 |
| C | -1.35550 | -4.86820 | 0.00000 |
| C | -1.19254 | -6.23276 | 0.00000 |
| C | 0.09416  | -6.79754 | 0.00000 |
| C | 1.19254  | -5.97558 | 0.00000 |
| C | -1.04773 | 4.57187  | 0.00000 |
| C | 0.24437  | 3.99476  | 0.00000 |
| C | -0.77345 | 1.73662  | 0.00000 |
| C | 0.37354  | 2.54977  | 0.00000 |
| C | -0.63910 | 0.29799  | 0.00000 |
| C | 0.63910  | -0.29799 | 0.00000 |
| C | -0.37354 | -2.54977 | 0.00000 |
| C | 0.77345  | -1.73662 | 0.00000 |
| C | -0.24437 | -3.99476 | 0.00000 |
| C | 1.04773  | -4.57187 | 0.00000 |
| H | 3.17591  | -4.16916 | 0.00000 |
| H | 2.95599  | -1.76278 | 0.00000 |
| H | 2.77044  | 0.14356  | 0.00000 |
| H | 2.54597  | 2.51537  | 0.00000 |
| H | 2.36157  | 4.46791  | 0.00000 |
| H | 2.06506  | 6.87790  | 0.00000 |
| H | -0.21502 | 7.87575  | 0.00000 |
| H | -2.19481 | 6.39393  | 0.00000 |
| H | -3.17591 | 4.16916  | 0.00000 |
| H | -2.95599 | 1.76278  | 0.00000 |
| H | -2.77044 | -0.14356 | 0.00000 |
| H | -2.54597 | -2.51537 | 0.00000 |

|   |          |          |         |
|---|----------|----------|---------|
| H | -2.36157 | -4.46791 | 0.00000 |
| H | -2.06506 | -6.87790 | 0.00000 |
| H | 0.21502  | -7.87575 | 0.00000 |
| H | 2.19481  | -6.39393 | 0.00000 |

-----  
singlet\_open\_shell\_unrestricted\_hexacene.xyz:

|   |         |          |          |
|---|---------|----------|----------|
| C | 0.00000 | 7.33019  | 0.71203  |
| C | 0.00000 | 6.15502  | 1.40212  |
| C | 0.00000 | 4.90130  | 0.71917  |
| C | 0.00000 | 4.90130  | -0.71917 |
| C | 0.00000 | 6.15502  | -1.40212 |
| C | 0.00000 | 7.33019  | -0.71203 |
| C | 0.00000 | 3.68551  | 1.40070  |
| C | 0.00000 | 3.68551  | -1.40070 |
| C | 0.00000 | 2.45544  | -0.72368 |
| C | 0.00000 | 2.45544  | 0.72368  |
| C | 0.00000 | 1.22710  | 1.40441  |
| H | 0.00000 | 1.22784  | 2.49083  |
| C | 0.00000 | 0.00000  | 0.72639  |
| C | 0.00000 | 0.00000  | -0.72639 |
| C | 0.00000 | 1.22710  | -1.40441 |
| H | 0.00000 | 3.68669  | 2.48735  |
| H | 0.00000 | 8.27550  | 1.24466  |
| H | 0.00000 | 6.15133  | 2.48811  |
| H | 0.00000 | 6.15133  | -2.48811 |
| H | 0.00000 | 8.27550  | -1.24466 |
| H | 0.00000 | 3.68669  | -2.48735 |
| H | 0.00000 | 1.22784  | -2.49083 |
| C | 0.00000 | -1.22710 | -1.40441 |
| C | 0.00000 | -1.22710 | 1.40441  |
| C | 0.00000 | -2.45544 | 0.72368  |
| C | 0.00000 | -2.45544 | -0.72368 |
| H | 0.00000 | -1.22784 | 2.49083  |
| H | 0.00000 | -1.22784 | -2.49083 |
| C | 0.00000 | -3.68551 | -1.40070 |
| C | 0.00000 | -3.68551 | 1.40070  |
| C | 0.00000 | -4.90130 | 0.71917  |
| C | 0.00000 | -4.90130 | -0.71917 |
| H | 0.00000 | -3.68669 | -2.48735 |
| H | 0.00000 | -3.68669 | 2.48735  |
| C | 0.00000 | -6.15502 | -1.40212 |

|   |         |          |          |
|---|---------|----------|----------|
| C | 0.00000 | -6.15502 | 1.40212  |
| C | 0.00000 | -7.33019 | -0.71203 |
| H | 0.00000 | -8.27550 | -1.24466 |
| C | 0.00000 | -7.33019 | 0.71203  |
| H | 0.00000 | -8.27550 | 1.24466  |
| H | 0.00000 | -6.15133 | -2.48811 |
| H | 0.00000 | -6.15133 | 2.48811  |

-----  
singlet\_open\_shell\_unrestricted\_triangulene.xyz:

|   |         |          |          |
|---|---------|----------|----------|
| C | 0.00000 | 1.20516  | -3.54169 |
| C | 0.00000 | 1.23035  | -2.13811 |
| C | 0.00000 | 0.00000  | -1.42947 |
| C | 0.00000 | -1.23035 | -2.13811 |
| C | 0.00000 | -1.20516 | -3.54169 |
| C | 0.00000 | 0.00000  | -4.22853 |
| H | 0.00000 | 2.14463  | -4.08566 |
| H | 0.00000 | -2.14463 | -4.08566 |
| H | 0.00000 | 0.00000  | -5.31371 |
| C | 0.00000 | 0.00000  | 0.00256  |
| C | 0.00000 | 1.22260  | 0.70943  |
| C | 0.00000 | 2.46974  | -0.01034 |
| C | 0.00000 | 1.22075  | 2.12981  |
| C | 0.00000 | 3.67563  | 0.72898  |
| C | 0.00000 | 2.47356  | 2.82112  |
| C | 0.00000 | 3.66215  | 2.12423  |
| H | 0.00000 | 2.46939  | 3.90633  |
| H | 0.00000 | 4.60263  | 2.66586  |
| C | 0.00000 | -1.22260 | 0.70943  |
| C | 0.00000 | -1.22075 | 2.12981  |
| C | 0.00000 | -2.46974 | -0.01034 |
| C | 0.00000 | -2.47356 | 2.82112  |
| C | 0.00000 | -3.67563 | 0.72898  |
| C | 0.00000 | -3.66215 | 2.12423  |
| H | 0.00000 | -2.46939 | 3.90633  |
| H | 0.00000 | -4.61857 | 0.19168  |
| H | 0.00000 | -4.60263 | 2.66586  |
| C | 0.00000 | -2.44942 | -1.40394 |
| C | 0.00000 | 2.44942  | -1.40394 |
| C | 0.00000 | 0.00000  | 2.80979  |
| H | 0.00000 | -3.38854 | -1.94952 |
| H | 0.00000 | 3.38854  | -1.94952 |

|   |         |         |         |
|---|---------|---------|---------|
| H | 0.00000 | 0.00000 | 3.89627 |
| H | 0.00000 | 4.61857 | 0.19168 |

-----

singlet\_open\_shell\_unrestricted\_uthrene.xyz:

|   |          |          |          |
|---|----------|----------|----------|
| C | -0.13003 | -1.21522 | 2.10409  |
| C | 0.13003  | 1.21522  | 2.10409  |
| C | 0.42795  | 3.65260  | 2.17578  |
| C | 0.44093  | 4.87038  | 1.51774  |
| C | 0.22439  | 4.93052  | 0.14942  |
| C | -0.29794 | 3.81057  | -1.98168 |
| C | -0.59498 | 2.65158  | -2.67419 |
| C | -0.52340 | 1.41236  | -2.05167 |
| C | 0.52340  | -1.41236 | -2.05167 |
| C | 0.59498  | -2.65158 | -2.67419 |
| C | 0.29794  | -3.81057 | -1.98168 |
| C | -0.22439 | -4.93052 | 0.14942  |
| C | -0.44093 | -4.87038 | 1.51774  |
| C | -0.42795 | -3.65260 | 2.17578  |
| C | 0.00000  | 3.75115  | -0.60961 |
| C | 0.04637  | 2.48171  | 0.03897  |
| C | -0.13373 | 1.28074  | -0.70255 |
| C | 0.00000  | 0.00000  | -0.02542 |
| C | 0.22429  | 2.44040  | 1.46154  |
| C | 0.00000  | 0.00000  | 1.38477  |
| C | 0.13373  | -1.28074 | -0.70255 |
| C | -0.04637 | -2.48171 | 0.03897  |
| C | 0.00000  | -3.75115 | -0.60961 |
| C | -0.22429 | -2.44040 | 1.46154  |
| H | -0.17839 | -1.17405 | 3.18822  |
| H | 0.17839  | 1.17405  | 3.18822  |
| H | 0.56652  | 3.60478  | 3.25113  |
| H | 0.60464  | 5.78502  | 2.07832  |
| H | 0.20863  | 5.88741  | -0.36246 |
| H | -0.33502 | 4.77678  | -2.47497 |
| H | -0.89695 | 2.70456  | -3.71524 |
| H | -0.82162 | 0.53732  | -2.61011 |
| H | 0.82162  | -0.53732 | -2.61011 |
| H | 0.89695  | -2.70456 | -3.71524 |
| H | 0.33502  | -4.77678 | -2.47497 |
| H | -0.20863 | -5.88741 | -0.36246 |
| H | -0.60464 | -5.78502 | 2.07832  |

|   |          |          |         |
|---|----------|----------|---------|
| H | -0.56652 | -3.60478 | 3.25113 |
|---|----------|----------|---------|

-----

singlet\_open\_shell\_unrestricted\_zethrene.xyz:

|   |          |          |         |
|---|----------|----------|---------|
| C | -1.64998 | 0.78968  | 0.00000 |
| C | -1.06710 | -1.62247 | 0.00000 |
| C | -0.34398 | -3.98443 | 0.00000 |
| C | 0.71132  | -4.93336 | 0.00000 |
| C | 2.01866  | -4.52538 | 0.00000 |
| C | 2.37800  | 2.06778  | 0.00000 |
| C | 2.69195  | 3.43549  | 0.00000 |
| C | 1.69958  | 4.38112  | 0.00000 |
| C | -0.71132 | 4.93336  | 0.00000 |
| C | -2.01866 | 4.52538  | 0.00000 |
| C | -2.33273 | 3.15475  | 0.00000 |
| C | 2.33273  | -3.15475 | 0.00000 |
| C | 1.33678  | -2.19721 | 0.00000 |
| C | 1.64998  | -0.78968 | 0.00000 |
| C | 0.71132  | 0.18530  | 0.00000 |
| C | -0.03043 | -2.59925 | 0.00000 |
| C | -0.71132 | -0.18530 | 0.00000 |
| C | 1.06710  | 1.62247  | 0.00000 |
| C | 0.03043  | 2.59925  | 0.00000 |
| C | 0.34398  | 3.98443  | 0.00000 |
| C | -1.33678 | 2.19721  | 0.00000 |
| H | -2.70442 | 0.53826  | 0.00000 |
| H | 0.46149  | -5.98987 | 0.00000 |
| H | 2.81900  | -5.25805 | 0.00000 |
| H | 3.19718  | 1.35921  | 0.00000 |
| H | 3.73390  | 3.73852  | 0.00000 |
| H | 1.94032  | 5.43974  | 0.00000 |
| H | -0.46149 | 5.98987  | 0.00000 |
| H | -2.81900 | 5.25805  | 0.00000 |
| H | -3.37178 | 2.83923  | 0.00000 |
| C | -2.37800 | -2.06778 | 0.00000 |
| C | -1.69958 | -4.38112 | 0.00000 |
| C | -2.69195 | -3.43549 | 0.00000 |
| H | -3.73390 | -3.73852 | 0.00000 |
| H | -3.19718 | -1.35921 | 0.00000 |
| H | -1.94032 | -5.43974 | 0.00000 |
| H | 2.70442  | -0.53826 | 0.00000 |
| H | 3.37178  | -2.83923 | 0.00000 |

-----  
triplet\_restricted\_open\_fulminene.xyz:

|   |          |          |         |
|---|----------|----------|---------|
| C | 2.18248  | -3.76059 | 0.00000 |
| C | 2.04488  | -2.39622 | 0.00000 |
| C | 1.74482  | 0.53432  | 0.00000 |
| C | 1.62049  | 1.96418  | 0.00000 |
| C | 1.35482  | 4.91510  | 0.00000 |
| C | 1.19163  | 6.28375  | 0.00000 |
| C | -0.09355 | 6.84487  | 0.00000 |
| C | -1.19163 | 6.01973  | 0.00000 |
| C | -2.18248 | 3.76059  | 0.00000 |
| C | -2.04488 | 2.39622  | 0.00000 |
| C | -1.74482 | -0.53432 | 0.00000 |
| C | -1.62049 | -1.96418 | 0.00000 |
| C | -1.35482 | -4.91510 | 0.00000 |
| C | -1.19163 | -6.28375 | 0.00000 |
| C | 0.09355  | -6.84487 | 0.00000 |
| C | 1.19163  | -6.01973 | 0.00000 |
| C | -1.04516 | 4.61609  | 0.00000 |
| C | 0.25020  | 4.04421  | 0.00000 |
| C | -0.78823 | 1.77051  | 0.00000 |
| C | 0.38996  | 2.58657  | 0.00000 |
| C | -0.66276 | 0.29718  | 0.00000 |
| C | 0.66276  | -0.29718 | 0.00000 |
| C | -0.38996 | -2.58657 | 0.00000 |
| C | 0.78823  | -1.77051 | 0.00000 |
| C | -0.25020 | -4.04421 | 0.00000 |
| C | 1.04516  | -4.61609 | 0.00000 |
| H | 3.17130  | -4.20785 | 0.00000 |
| H | 2.94517  | -1.79457 | 0.00000 |
| H | 2.75046  | 0.13382  | 0.00000 |
| H | 2.53484  | 2.54222  | 0.00000 |
| H | 2.36127  | 4.51479  | 0.00000 |
| H | 2.06402  | 6.92889  | 0.00000 |
| H | -0.21733 | 7.92276  | 0.00000 |
| H | -2.19444 | 6.43658  | 0.00000 |
| H | -3.17130 | 4.20785  | 0.00000 |
| H | -2.94517 | 1.79457  | 0.00000 |
| H | -2.75046 | -0.13382 | 0.00000 |
| H | -2.53484 | -2.54222 | 0.00000 |
| H | -2.36127 | -4.51479 | 0.00000 |

|   |          |          |         |
|---|----------|----------|---------|
| H | -2.06402 | -6.92889 | 0.00000 |
| H | 0.21733  | -7.92276 | 0.00000 |
| H | 2.19444  | -6.43658 | 0.00000 |

-----

triplet\_restricted\_open\_hexacene.xyz:

|   |         |          |          |
|---|---------|----------|----------|
| C | 0.00000 | 7.34109  | 0.70601  |
| C | 0.00000 | 6.15705  | 1.39684  |
| C | 0.00000 | 4.91753  | 0.71261  |
| C | 0.00000 | 4.91753  | -0.71261 |
| C | 0.00000 | 6.15705  | -1.39684 |
| C | 0.00000 | 7.34109  | -0.70601 |
| C | 0.00000 | 3.67979  | 1.39631  |
| C | 0.00000 | 3.67979  | -1.39631 |
| C | 0.00000 | 2.47415  | -0.72276 |
| C | 0.00000 | 2.47415  | 0.72276  |
| C | 0.00000 | 1.22021  | 1.40436  |
| H | 0.00000 | 1.22299  | 2.49056  |
| C | 0.00000 | 0.00000  | 0.73294  |
| C | 0.00000 | 0.00000  | -0.73294 |
| C | 0.00000 | 1.22021  | -1.40436 |
| H | 0.00000 | 3.68287  | 2.48304  |
| H | 0.00000 | 8.28387  | 1.24309  |
| H | 0.00000 | 6.15355  | 2.48287  |
| H | 0.00000 | 6.15355  | -2.48287 |
| H | 0.00000 | 8.28387  | -1.24309 |
| H | 0.00000 | 3.68287  | -2.48304 |
| H | 0.00000 | 1.22299  | -2.49056 |
| C | 0.00000 | -1.22021 | -1.40436 |
| C | 0.00000 | -1.22021 | 1.40436  |
| C | 0.00000 | -2.47415 | 0.72276  |
| C | 0.00000 | -2.47415 | -0.72276 |
| H | 0.00000 | -1.22299 | 2.49056  |
| H | 0.00000 | -1.22299 | -2.49056 |
| C | 0.00000 | -3.67979 | -1.39631 |
| C | 0.00000 | -3.67979 | 1.39631  |
| C | 0.00000 | -4.91753 | 0.71261  |
| C | 0.00000 | -4.91753 | -0.71261 |
| H | 0.00000 | -3.68287 | -2.48304 |
| H | 0.00000 | -3.68287 | 2.48304  |
| C | 0.00000 | -6.15705 | -1.39684 |
| C | 0.00000 | -6.15705 | 1.39684  |

|   |         |          |          |
|---|---------|----------|----------|
| C | 0.00000 | -7.34109 | -0.70601 |
| H | 0.00000 | -8.28387 | -1.24309 |
| C | 0.00000 | -7.34109 | 0.70601  |
| H | 0.00000 | -8.28387 | 1.24309  |
| H | 0.00000 | -6.15355 | -2.48287 |
| H | 0.00000 | -6.15355 | 2.48287  |

-----

triplet\_restricted\_open\_triangulene.xyz:

|   |          |          |         |
|---|----------|----------|---------|
| C | 1.20525  | 3.54410  | 0.00000 |
| C | 1.23578  | 2.12971  | 0.00000 |
| C | 0.00000  | 1.41757  | 0.00000 |
| C | -1.23578 | 2.12971  | 0.00000 |
| C | -1.20525 | 3.54410  | 0.00000 |
| C | 0.00000  | 4.22796  | 0.00000 |
| H | 2.14438  | 4.08806  | 0.00000 |
| H | -2.14438 | 4.08806  | 0.00000 |
| H | 0.00000  | 5.31317  | 0.00000 |
| C | 0.00000  | 0.00000  | 0.00000 |
| C | 1.22765  | -0.70879 | 0.00000 |
| C | 2.46227  | 0.00536  | 0.00000 |
| C | 1.22649  | -2.13507 | 0.00000 |
| C | 3.67191  | -0.72828 | 0.00000 |
| C | 2.46666  | -2.81582 | 0.00000 |
| C | 3.66152  | -2.11398 | 0.00000 |
| H | 2.46818  | -3.90111 | 0.00000 |
| H | 4.60134  | -2.65659 | 0.00000 |
| C | -1.22765 | -0.70879 | 0.00000 |
| C | -1.22649 | -2.13507 | 0.00000 |
| C | -2.46227 | 0.00536  | 0.00000 |
| C | -2.46666 | -2.81582 | 0.00000 |
| C | -3.67191 | -0.72828 | 0.00000 |
| C | -3.66152 | -2.11398 | 0.00000 |
| H | -2.46818 | -3.90111 | 0.00000 |
| H | -4.61255 | -0.18695 | 0.00000 |
| H | -4.60134 | -2.65659 | 0.00000 |
| C | -2.43969 | 1.40856  | 0.00000 |
| C | 2.43969  | 1.40856  | 0.00000 |
| C | 0.00000  | -2.81711 | 0.00000 |
| H | -3.38028 | 1.95161  | 0.00000 |
| H | 3.38028  | 1.95161  | 0.00000 |
| H | 0.00000  | -3.90321 | 0.00000 |



|   |         |          |         |
|---|---------|----------|---------|
| H | 4.61255 | -0.18695 | 0.00000 |
|---|---------|----------|---------|

-----  
triplet\_restricted\_open\_uthrene.xyz:

|   |          |          |          |
|---|----------|----------|----------|
| C | -0.11608 | -1.21047 | 2.11220  |
| C | 0.11608  | 1.21047  | 2.11220  |
| C | 0.37543  | 3.65205  | 2.16367  |
| C | 0.36821  | 4.87651  | 1.50118  |
| C | 0.14388  | 4.93047  | 0.14242  |
| C | -0.37407 | 3.79704  | -1.98572 |
| C | -0.65562 | 2.63723  | -2.66920 |
| C | -0.56351 | 1.39552  | -2.03931 |
| C | 0.56351  | -1.39552 | -2.03931 |
| C | 0.65562  | -2.63723 | -2.66920 |
| C | 0.37407  | -3.79704 | -1.98572 |
| C | -0.14388 | -4.93047 | 0.14242  |
| C | -0.36821 | -4.87651 | 1.50118  |
| C | -0.37543 | -3.65205 | 2.16367  |
| C | -0.06671 | 3.74720  | -0.60915 |
| C | 0.00000  | 2.48556  | 0.04256  |
| C | -0.16787 | 1.27361  | -0.69875 |
| C | 0.00000  | 0.00000  | -0.02372 |
| C | 0.18881  | 2.45076  | 1.46018  |
| C | 0.00000  | 0.00000  | 1.40407  |
| C | 0.16787  | -1.27361 | -0.69875 |
| C | 0.00000  | -2.48556 | 0.04256  |
| C | 0.06671  | -3.74720 | -0.60915 |
| C | -0.18881 | -2.45076 | 1.46018  |
| H | -0.16373 | -1.17807 | 3.19642  |
| H | 0.16373  | 1.17807  | 3.19642  |
| H | 0.51678  | 3.61212  | 3.23910  |
| H | 0.52144  | 5.79275  | 2.06205  |
| H | 0.11038  | 5.88546  | -0.37248 |
| H | -0.42596 | 4.76151  | -2.48110 |
| H | -0.95880 | 2.67973  | -3.71037 |
| H | -0.84843 | 0.51402  | -2.59522 |
| H | 0.84843  | -0.51402 | -2.59522 |
| H | 0.95880  | -2.67973 | -3.71037 |
| H | 0.42596  | -4.76151 | -2.48110 |
| H | -0.11038 | -5.88546 | -0.37248 |
| H | -0.52144 | -5.79275 | 2.06205  |
| H | -0.51678 | -3.61212 | 3.23910  |

-----  
triplet\_restricted\_open\_zethrene.xyz:

|   |          |          |         |
|---|----------|----------|---------|
| C | -1.66868 | 0.83304  | 0.00000 |
| C | -1.04883 | -1.58976 | 0.00000 |
| C | -0.36202 | -3.96014 | 0.00000 |
| C | 0.68117  | -4.92090 | 0.00000 |
| C | 2.01292  | -4.52872 | 0.00000 |
| C | 2.38830  | 2.02421  | 0.00000 |
| C | 2.70790  | 3.37311  | 0.00000 |
| C | 1.71474  | 4.33759  | 0.00000 |
| C | -0.68117 | 4.92090  | 0.00000 |
| C | -2.01292 | 4.52872  | 0.00000 |
| C | -2.35117 | 3.19059  | 0.00000 |
| C | 2.35117  | -3.19059 | 0.00000 |
| C | 1.34588  | -2.18065 | 0.00000 |
| C | 1.66868  | -0.83304 | 0.00000 |
| C | 0.68117  | 0.18376  | 0.00000 |
| C | -0.03228 | -2.57315 | 0.00000 |
| C | -0.68117 | -0.18376 | 0.00000 |
| C | 1.04883  | 1.58976  | 0.00000 |
| C | 0.03228  | 2.57315  | 0.00000 |
| C | 0.36202  | 3.96014  | 0.00000 |
| C | -1.34588 | 2.18065  | 0.00000 |
| H | -2.71817 | 0.56893  | 0.00000 |
| H | 0.41991  | -5.97410 | 0.00000 |
| H | 2.79410  | -5.28198 | 0.00000 |
| H | 3.19611  | 1.30479  | 0.00000 |
| H | 3.75088  | 3.67286  | 0.00000 |
| H | 1.97013  | 5.39258  | 0.00000 |
| H | -0.41991 | 5.97410  | 0.00000 |
| H | -2.79410 | 5.28198  | 0.00000 |
| H | -3.39264 | 2.88533  | 0.00000 |
| C | -2.38830 | -2.02421 | 0.00000 |
| C | -1.71474 | -4.33759 | 0.00000 |
| C | -2.70790 | -3.37311 | 0.00000 |
| H | -3.75088 | -3.67286 | 0.00000 |
| H | -3.19611 | -1.30479 | 0.00000 |
| H | -1.97013 | -5.39258 | 0.00000 |
| H | 2.71817  | -0.56893 | 0.00000 |
| H | 3.39264  | -2.88533 | 0.00000 |

-----

triplet\_unrestricted\_fulminene.xyz:

|   |          |          |         |
|---|----------|----------|---------|
| C | 2.18474  | -3.76370 | 0.00000 |
| C | 2.04702  | -2.39779 | 0.00000 |
| C | 1.74456  | 0.53113  | 0.00000 |
| C | 1.62042  | 1.96692  | 0.00000 |
| C | 1.35440  | 4.91633  | 0.00000 |
| C | 1.19194  | 6.28536  | 0.00000 |
| C | -0.09297 | 6.84732  | 0.00000 |
| C | -1.19194 | 6.02248  | 0.00000 |
| C | -2.18474 | 3.76370  | 0.00000 |
| C | -2.04702 | 2.39779  | 0.00000 |
| C | -1.74456 | -0.53113 | 0.00000 |
| C | -1.62042 | -1.96692 | 0.00000 |
| C | -1.35440 | -4.91633 | 0.00000 |
| C | -1.19194 | -6.28536 | 0.00000 |
| C | 0.09297  | -6.84732 | 0.00000 |
| C | 1.19194  | -6.02248 | 0.00000 |
| C | -1.04628 | 4.61910  | 0.00000 |
| C | 0.24904  | 4.04602  | 0.00000 |
| C | -0.79053 | 1.77205  | 0.00000 |
| C | 0.38855  | 2.58883  | 0.00000 |
| C | -0.66486 | 0.29778  | 0.00000 |
| C | 0.66486  | -0.29778 | 0.00000 |
| C | -0.38855 | -2.58883 | 0.00000 |
| C | 0.79053  | -1.77205 | 0.00000 |
| C | -0.24904 | -4.04602 | 0.00000 |
| C | 1.04628  | -4.61910 | 0.00000 |
| H | 3.17343  | -4.21135 | 0.00000 |
| H | 2.94767  | -1.79652 | 0.00000 |
| H | 2.75049  | 0.13136  | 0.00000 |
| H | 2.53526  | 2.54432  | 0.00000 |
| H | 2.36071  | 4.51555  | 0.00000 |
| H | 2.06491  | 6.92975  | 0.00000 |
| H | -0.21646 | 7.92525  | 0.00000 |
| H | -2.19441 | 6.44023  | 0.00000 |
| H | -3.17343 | 4.21135  | 0.00000 |
| H | -2.94767 | 1.79652  | 0.00000 |
| H | -2.75049 | -0.13136 | 0.00000 |
| H | -2.53526 | -2.54432 | 0.00000 |
| H | -2.36071 | -4.51555 | 0.00000 |
| H | -2.06491 | -6.92975 | 0.00000 |

|   |         |          |         |
|---|---------|----------|---------|
| H | 0.21646 | -7.92525 | 0.00000 |
| H | 2.19441 | -6.44023 | 0.00000 |

-----

triplet\_unrestricted\_hexacene.xyz:

|   |         |          |          |
|---|---------|----------|----------|
| C | 0.00000 | 7.34386  | 0.70567  |
| C | 0.00000 | 6.15914  | 1.39634  |
| C | 0.00000 | 4.92032  | 0.71222  |
| C | 0.00000 | 4.92032  | -0.71222 |
| C | 0.00000 | 6.15914  | -1.39634 |
| C | 0.00000 | 7.34386  | -0.70567 |
| C | 0.00000 | 3.68116  | 1.39642  |
| C | 0.00000 | 3.68116  | -1.39642 |
| C | 0.00000 | 2.47559  | -0.72350 |
| C | 0.00000 | 2.47559  | 0.72350  |
| C | 0.00000 | 1.22164  | 1.40614  |
| H | 0.00000 | 1.22498  | 2.49249  |
| C | 0.00000 | 0.00000  | 0.73466  |
| C | 0.00000 | 0.00000  | -0.73466 |
| C | 0.00000 | 1.22164  | -1.40614 |
| H | 0.00000 | 3.68416  | 2.48321  |
| H | 0.00000 | 8.28651  | 1.24300  |
| H | 0.00000 | 6.15540  | 2.48240  |
| H | 0.00000 | 6.15540  | -2.48240 |
| H | 0.00000 | 8.28651  | -1.24300 |
| H | 0.00000 | 3.68416  | -2.48321 |
| H | 0.00000 | 1.22498  | -2.49249 |
| C | 0.00000 | -1.22164 | -1.40614 |
| C | 0.00000 | -1.22164 | 1.40614  |
| C | 0.00000 | -2.47559 | 0.72350  |
| C | 0.00000 | -2.47559 | -0.72350 |
| H | 0.00000 | -1.22498 | 2.49249  |
| H | 0.00000 | -1.22498 | -2.49249 |
| C | 0.00000 | -3.68116 | -1.39642 |
| C | 0.00000 | -3.68116 | 1.39642  |
| C | 0.00000 | -4.92032 | 0.71222  |
| C | 0.00000 | -4.92032 | -0.71222 |
| H | 0.00000 | -3.68416 | -2.48321 |
| H | 0.00000 | -3.68416 | 2.48321  |
| C | 0.00000 | -6.15914 | -1.39634 |
| C | 0.00000 | -6.15914 | 1.39634  |
| C | 0.00000 | -7.34386 | -0.70567 |

|   |         |          |          |
|---|---------|----------|----------|
| H | 0.00000 | -8.28651 | -1.24300 |
| C | 0.00000 | -7.34386 | 0.70567  |
| H | 0.00000 | -8.28651 | 1.24300  |
| H | 0.00000 | -6.15540 | -2.48240 |
| H | 0.00000 | -6.15540 | 2.48240  |

-----

triplet\_unrestricted\_triangulene.xyz:

|   |          |          |         |
|---|----------|----------|---------|
| C | 1.20629  | 3.54759  | 0.00000 |
| C | 1.23620  | 2.13181  | 0.00000 |
| C | 0.00000  | 1.41911  | 0.00000 |
| C | -1.23620 | 2.13181  | 0.00000 |
| C | -1.20629 | 3.54759  | 0.00000 |
| C | 0.00000  | 4.23291  | 0.00000 |
| H | 2.14573  | 4.09124  | 0.00000 |
| H | -2.14573 | 4.09124  | 0.00000 |
| H | 0.00000  | 5.31815  | 0.00000 |
| C | 0.00000  | 0.00000  | 0.00000 |
| C | 1.22899  | -0.70956 | 0.00000 |
| C | 2.46430  | 0.00468  | 0.00000 |
| C | 1.22810  | -2.13649 | 0.00000 |
| C | 3.67544  | -0.72912 | 0.00000 |
| C | 2.46916  | -2.81847 | 0.00000 |
| C | 3.66581  | -2.11646 | 0.00000 |
| H | 2.47025  | -3.90388 | 0.00000 |
| H | 4.60565  | -2.65907 | 0.00000 |
| C | -1.22899 | -0.70956 | 0.00000 |
| C | -1.22810 | -2.13649 | 0.00000 |
| C | -2.46430 | 0.00468  | 0.00000 |
| C | -2.46916 | -2.81847 | 0.00000 |
| C | -3.67544 | -0.72912 | 0.00000 |
| C | -3.66581 | -2.11646 | 0.00000 |
| H | -2.47025 | -3.90388 | 0.00000 |
| H | -4.61598 | -0.18736 | 0.00000 |
| H | -4.60565 | -2.65907 | 0.00000 |
| C | -2.44163 | 1.40968  | 0.00000 |
| C | 2.44163  | 1.40968  | 0.00000 |
| C | 0.00000  | -2.81935 | 0.00000 |
| H | -3.38236 | 1.95281  | 0.00000 |
| H | 3.38236  | 1.95281  | 0.00000 |
| H | 0.00000  | -3.90562 | 0.00000 |
| H | 4.61598  | -0.18736 | 0.00000 |

-----  
triplet\_unrestricted\_uthrene.xyz:

|   |          |          |          |
|---|----------|----------|----------|
| C | -0.11766 | -1.21175 | 2.11362  |
| C | 0.11766  | 1.21175  | 2.11362  |
| C | 0.37752  | 3.65593  | 2.16626  |
| C | 0.37021  | 4.87801  | 1.50442  |
| C | 0.14524  | 4.93132  | 0.14148  |
| C | -0.37220 | 3.79739  | -1.98652 |
| C | -0.65505 | 2.63542  | -2.67209 |
| C | -0.56413 | 1.39549  | -2.04307 |
| C | 0.56413  | -1.39549 | -2.04307 |
| C | 0.65505  | -2.63542 | -2.67209 |
| C | 0.37220  | -3.79739 | -1.98652 |
| C | -0.14524 | -4.93132 | 0.14148  |
| C | -0.37021 | -4.87801 | 1.50442  |
| C | -0.37752 | -3.65593 | 2.16626  |
| C | -0.06592 | 3.74752  | -0.60976 |
| C | 0.00000  | 2.48471  | 0.04288  |
| C | -0.16702 | 1.27329  | -0.69824 |
| C | 0.00000  | 0.00000  | -0.02488 |
| C | 0.18943  | 2.45008  | 1.46077  |
| C | 0.00000  | 0.00000  | 1.40607  |
| C | 0.16702  | -1.27329 | -0.69824 |
| C | 0.00000  | -2.48471 | 0.04288  |
| C | 0.06592  | -3.74752 | -0.60976 |
| C | -0.18943 | -2.45008 | 1.46077  |
| H | -0.16625 | -1.17999 | 3.19799  |
| H | 0.16625  | 1.17999  | 3.19799  |
| H | 0.52059  | 3.61490  | 3.24143  |
| H | 0.52383  | 5.79507  | 2.06372  |
| H | 0.11221  | 5.88631  | -0.37330 |
| H | -0.42369 | 4.76169  | -2.48216 |
| H | -0.95948 | 2.67954  | -3.71276 |
| H | -0.85171 | 0.51366  | -2.59693 |
| H | 0.85171  | -0.51366 | -2.59693 |
| H | 0.95948  | -2.67954 | -3.71276 |
| H | 0.42369  | -4.76169 | -2.48216 |
| H | -0.11221 | -5.88631 | -0.37330 |
| H | -0.52383 | -5.79507 | 2.06372  |
| H | -0.52059 | -3.61490 | 3.24143  |

-----

triplet\_unrestricted\_zethrene.xyz:

|   |          |          |         |
|---|----------|----------|---------|
| C | -1.67044 | 0.83397  | 0.00000 |
| C | -1.04698 | -1.58956 | 0.00000 |
| C | -0.36258 | -3.96127 | 0.00000 |
| C | 0.67974  | -4.92312 | 0.00000 |
| C | 2.01428  | -4.53170 | 0.00000 |
| C | 2.38889  | 2.02333  | 0.00000 |
| C | 2.71011  | 3.37252  | 0.00000 |
| C | 1.71699  | 4.33808  | 0.00000 |
| C | -0.67974 | 4.92312  | 0.00000 |
| C | -2.01428 | 4.53170  | 0.00000 |
| C | -2.35359 | 3.19306  | 0.00000 |
| C | 2.35359  | -3.19306 | 0.00000 |
| C | 1.34726  | -2.18162 | 0.00000 |
| C | 1.67044  | -0.83397 | 0.00000 |
| C | 0.67974  | 0.18427  | 0.00000 |
| C | -0.03119 | -2.57329 | 0.00000 |
| C | -0.67974 | -0.18427 | 0.00000 |
| C | 1.04698  | 1.58956  | 0.00000 |
| C | 0.03119  | 2.57329  | 0.00000 |
| C | 0.36258  | 3.96127  | 0.00000 |
| C | -1.34726 | 2.18162  | 0.00000 |
| H | -2.72003 | 0.56965  | 0.00000 |
| H | 0.41722  | -5.97616 | 0.00000 |
| H | 2.79490  | -5.28557 | 0.00000 |
| H | 3.19597  | 1.30297  | 0.00000 |
| H | 3.75338  | 3.67131  | 0.00000 |
| H | 1.97306  | 5.39297  | 0.00000 |
| H | -0.41722 | 5.97616  | 0.00000 |
| H | -2.79490 | 5.28557  | 0.00000 |
| H | -3.39531 | 2.88824  | 0.00000 |
| C | -2.38889 | -2.02333 | 0.00000 |
| C | -1.71699 | -4.33808 | 0.00000 |
| C | -2.71011 | -3.37252 | 0.00000 |
| H | -3.75338 | -3.67131 | 0.00000 |
| H | -3.19597 | -1.30297 | 0.00000 |
| H | -1.97306 | -5.39297 | 0.00000 |
| H | 2.72003  | -0.56965 | 0.00000 |
| H | 3.39531  | -2.88824 | 0.00000 |

---
